# Supplementary material for: Prevalence and severity of bowel disorders in the third trimester of pregnancy
Source: AJOG Glob Rep. 2023 May 17;3(3):100218. doi: 10.1016/j.xagr.2023.100218 (PMC10461240; doi:10.1016/j.xagr.2023.100218)
Supplement: Supplementary file 2 [file mmc2.pdf]

**Questionario pavimento pelvico  
per gestanti e postpartum**

**Modulo fattori di rischio**

**Rischio**

|                                                                                                            |                                                      |                                                                           |                                                    |                              |
|------------------------------------------------------------------------------------------------------------|------------------------------------------------------|---------------------------------------------------------------------------|----------------------------------------------------|------------------------------|
| Altezza<br><input type="text"/> <input type="text"/> <input type="text"/> cm                               | Peso<br><input type="text"/> <input type="text"/> kg | Peso pregravidico<br>per BMI <input type="text"/> <input type="text"/> kg | BMI<br><input type="text"/> <input type="text"/> , | <input type="checkbox"/> >25 |
| Età                                                                                                        |                                                      | <input type="text"/> <input type="text"/> anni                            |                                                    | <input type="checkbox"/> >35 |
| In famiglia ci sono/sono state donne con incontinenza urinaria,intestinale, prolasso degli organi pelvici? |                                                      | <input type="checkbox"/> no                                               | <input type="checkbox"/> non so                    | <input type="checkbox"/> si  |
| Fuma?                                                                                                      |                                                      | <input type="checkbox"/> no                                               | <input type="checkbox"/> ho smesso                 | <input type="checkbox"/> si  |
| Ritiene di essere in grado di contrarre la muscolatura del pavimento pelvico?                              |                                                      | <input type="checkbox"/> si                                               | <input type="checkbox"/> non so                    | <input type="checkbox"/> no  |

**Funzionalità della vescica**

|                                                                               |                 |                                            |                                                            |                                 |
|-------------------------------------------------------------------------------|-----------------|--------------------------------------------|------------------------------------------------------------|---------------------------------|
| 1. ogni quanto urina nell'arco della giornata?                                | 0. ogni 3 ore   | 1. ogni 2 ore                              | 2. ogni ora                                                | 3. più spesso                   |
| 2. quante volte si sveglia la notte per urinare ?                             | 0. 0-1 volta    | 1. 2 volte                                 | 2. 3 volte                                                 | 3. più di 3 volte               |
| 3. ha perdite urinarie mentre dorme?                                          | 0. mai          | 1. talvolta/meno di una volta la settimana | 2. spesso/una o più volte la settimana                     | 3. molto spesso/quotidianamente |
| 4. lo stimolo urinario è così forte da dover andare subito in bagno?          | 0. mai          | 1. talvolta/meno di una volta la settimana | 2. spesso/una o più volte la settimana                     | 3. molto spesso/quotidianamente |
| 5. quando sente l'urgenza di urinare, perde urina prima di arrivare in bagno? | 0. mai          | 1. talvolta/meno di una volta la settimana | 2. spesso/una o più volte la settimana                     | 3. molto spesso/quotidianamente |
| 6. perde urina quando tossisce, starnutisce, ride, fa sforzi o fa sport?      | 0. mai          | 1. talvolta/meno di una volta la settimana | 2. spesso/una o più volte la settimana                     | 3. molto spesso/quotidianamente |
| 7. Il flusso urinario è debole, rallentato o prolungato?                      | 0. mai          | 1. talvolta/meno di una volta la settimana | 2. spesso/una o più volte la settimana                     | 3. molto spesso/quotidianamente |
| 8. ha la corretta percezione di quanto sia piena la vescica?                  | 0.si/<br>sempre | 1. quasi sempre                            | 2.talvolta                                                 | 3.no/mai                        |
| 9. ha la sensazione di non svuotare completamente la vescica?                 | 0. mai          | 1. talvolta/meno di una volta la settimana | 2. spesso/una o più volte la settimana                     | 3. molto spesso/quotidianamente |
| 10. deve spingere per poter urinare?                                          | 0. mai          | 1. talvolta/meno di una volta la settimana | 2. spesso/una o più volte la settimana                     | 3. molto spesso/quotidianamente |
| 11. usa salvaslip o assorbenti a causa delle perdite urinarie?                | 0.mai           | 1.talvolta/solo come precauzione           | 2.spesso/durante attività fisica o quando sono raffreddata | 3. molto spesso/quotidianamente |
| 12. limita l'assunzione di liquidi per evitare le perdite urinarie?           | 0. mai          | 1. talvolta/meno di una volta la settimana | 2. spesso/una o più volte la settimana                     | 3. molto spesso/quotidianamente |

|                                                                                                                   |                                                                 |               |                                            |                                        |                                 |
|-------------------------------------------------------------------------------------------------------------------|-----------------------------------------------------------------|---------------|--------------------------------------------|----------------------------------------|---------------------------------|
| 13. quando urina ha bruciore, fastidio o dolore?                                                                  |                                                                 | 0. mai        | 1. talvolta/meno di una volta la settimana | 2. spesso/una o più volte la settimana | 3. molto spesso/quotidianamente |
| 14. quanto spesso ha infezioni alle vie urinarie?                                                                 |                                                                 | 0. raramente  | 1. 1-3 volte all'anno                      | 2. 4-12 volte all'anno                 | 3. una o più volte al mese      |
| 15. le perdite urinarie influiscono sulla sua vita quotidiana (ad es. su attività fisica, lavoro, spesa, uscite)? | <input type="checkbox"/> non mi riguarda, perché non ho sintomi | 0. per niente | 1. un poco                                 | 2. abbastanza                          | 3. molto                        |
| 16. Quanto la infastidiscono questi disturbi alla vescica?                                                        | <input type="checkbox"/> non mi riguarda, perché non ho sintomi | 0. per niente | 1. un poco                                 | 2. abbastanza                          | 3. molto                        |

### Funzionalità intestinale

|                                                                           |                                        |                                            |                                        |                                     |
|---------------------------------------------------------------------------|----------------------------------------|--------------------------------------------|----------------------------------------|-------------------------------------|
| 1. quante volte si scarica?                                               | 0. da ogni 3 giorni a quotidiana mente | 1. più di una volta al giorno              | 1. ogni 4 giorni o più raramente       | 2. meno di una volta alla settimana |
| 2. normalmente com'è la consistenza delle feci?                           | 0. morbide/composte                    | 1. varia                                   | 1. molto dure                          | 2. liquido/pastose                  |
| 3. spinge molto per scaricarsi?                                           | 0. mai                                 | 1. talvolta/meno di una volta la settimana | 2. spesso/una o più volte la settimana | 3. molto spesso/quotidianamente     |
| 4. soffre di stitichezza?                                                 | 0. mai                                 | 1. talvolta/meno di una volta la settimana | 2. spesso/una o più volte la settimana | 3. molto spesso/quotidianamente     |
| 5. soffre di flatulenza e non riesce a trattenere l'aria?                 | 0. mai                                 | 1. talvolta/meno di una volta la settimana | 2. spesso/una o più volte la settimana | 3. molto spesso/quotidianamente     |
| 6. sente improvvisamente l'urgenza di evacuare?                           | 0. mai                                 | 1. talvolta/meno di una volta la settimana | 2. spesso/una o più volte la settimana | 3. molto spesso/quotidianamente     |
| 7. Trova gli slip o l'assorbente sporchi di feci?                         | 0. mai                                 | 1. talvolta/meno di una volta la settimana | 2. spesso/una o più volte la settimana | 3. molto spesso/quotidianamente     |
| 8. ha perdite di feci o non riesce a trattenerle?                         | 0. mai                                 | 1. talvolta/meno di una volta la settimana | 2. spesso/una o più volte la settimana | 3. molto spesso/quotidianamente     |
| 9. ha la sensazione di non riuscire a svuotare completamente l'intestino? | 0. mai                                 | 1. talvolta/meno di una volta la settimana | 2. spesso/una o più volte la settimana | 3. molto spesso/quotidianamente     |

|                                                                                                               |                                                                 |              |           |              |         |
|---------------------------------------------------------------------------------------------------------------|-----------------------------------------------------------------|--------------|-----------|--------------|---------|
| 10. questi sintomi influiscono sulla sua vita quotidiana? (impegni quotidiani, sport, lavoro, spesa, uscite)? | <input type="checkbox"/> non mi riguarda, perché non ho sintomi | 0.per niente | 1.un poco | 2.abbastanza | 3.molto |
| 11. quanto la infastidiscono i problemi intestinali?                                                          | <input type="checkbox"/> non mi riguarda, perché non ho sintomi | 0.per niente | 1.un poco | 2.abbastanza | 3.molto |

### Prolasso

|                                                                                    |                                                                 |              |                                            |                                        |                                 |
|------------------------------------------------------------------------------------|-----------------------------------------------------------------|--------------|--------------------------------------------|----------------------------------------|---------------------------------|
| 1. Ha la sensazione di avere un corpo estraneo in vagina?                          |                                                                 | 0. mai       | 1. talvolta/meno di una volta la settimana | 2. spesso/una o più volte la settimana | 3. molto spesso/quotidianamente |
| 2. Percepisce un abbassamento dell'utero o della vagina?                           |                                                                 | 0. mai       | 1. talvolta/meno di una volta la settimana | 2. spesso/una o più volte la settimana | 3. molto spesso/quotidianamente |
| 3. Mentre solleva pesi, cammina, corre, le sembra che vagina o utero si abbassino? |                                                                 | 0.per niente | 1.un poco                                  | 2.abbastanza                           | 3.molto                         |
| 4. Questi disturbi quanto influiscono sulla sua vita quotidiana?                   | <input type="checkbox"/> non mi riguarda, perché non ho sintomi | 0.per niente | 1.un poco                                  | 2.abbastanza                           | 3.molto                         |
| 5. Quanto la disturba il prolasso?                                                 | <input type="checkbox"/> non mi riguarda, perché non ho sintomi | 0.per niente | 1.un poco                                  | 2.abbastanza                           | 3.molto                         |

### Sessualità

|                                                                           |                                            |                                                           |                                                 |                                                                                   |
|---------------------------------------------------------------------------|--------------------------------------------|-----------------------------------------------------------|-------------------------------------------------|-----------------------------------------------------------------------------------|
| E' sessualmente attiva?                                                   | <input type="checkbox"/> no                | <input type="checkbox"/> raramente                        | <input type="checkbox"/> regolarmente           |                                                                                   |
| Nel caso non abbia rapporti, per quale motivo?                            | <input type="checkbox"/> Non ho un partner | <input type="checkbox"/> Il partner ha problemi/impotenza | <input type="checkbox"/> Non ho alcun desiderio | <input type="checkbox"/> I rapporti sessuali sono spiacevoli perché.....<br>..... |
| Ha avuto esperienze sessuali che l'hanno traumatizzata?                   | <input type="checkbox"/> no                |                                                           |                                                 | <input type="checkbox"/> si                                                       |
| 1. Durante i rapporti sessuali, la vagina è sufficientemente lubrificata? | <input type="checkbox"/> si                |                                                           |                                                 | <input type="checkbox"/> no                                                       |
| 2. Qual è il livello di sensibilità durante il rapporto?                  | 0.elevato                                  | 1.discreto/scarso                                         | 2 .nullo                                        | 3. ho dolore                                                                      |
| 3. Pensa che la sua vagina sia ridondante o lassa?                        | 0. no/mai                                  | 1. talvolta                                               | 2. spesso                                       | 3. sempre                                                                         |
| 4. Pensa che la sua vagina si stretta o rigida?                           | 0. no/mai                                  | 1. talvolta                                               | 2. spesso                                       | 3. sempre                                                                         |

|                                                                   |                                                                 |                      |             |                                  |             |
|-------------------------------------------------------------------|-----------------------------------------------------------------|----------------------|-------------|----------------------------------|-------------|
| 5. Ha dolori durante il rapporto?                                 |                                                                 | 0. no/mai            | 1. talvolta | 2. spesso                        | 3. sempre   |
| 6. Se ha dolore durante il rapporto, dove?                        |                                                                 | 1. alla penetrazione |             | 2. in profondità/<br>nella pelvi | 3. entrambi |
| 7. Durante il rapporto, ha perdite incontrollate di urina o feci? |                                                                 | 0. no/mai            | 1. talvolta | 2. spesso                        | 3. sempre   |
| 8. Questi sintomi influenzano la sua vita sessuale?               | <input type="checkbox"/> non mi riguarda, perché non ho sintomi | 0.per niente         | 1.un poco   | 2.abbastanza                     | 3.molto     |
| 9. Quanto la infastidiscono questi sintomi?                       | <input type="checkbox"/> non mi riguarda, perché non ho sintomi | 0.per niente         | 1.un poco   | 2.abbastanza                     | 3.molto     |

**Score (sezione da non compilare)**

|                                                                          |                   |                            |                    |              |                  |
|--------------------------------------------------------------------------|-------------------|----------------------------|--------------------|--------------|------------------|
| <b>Funzionalità della vescica</b>                                        | domande da 1 a 16 | score $\square\square/48=$ | $\square, \square$ | $\times 10=$ | $\square\square$ |
| <b>Funzionalità intestinale</b>                                          | domande da 1 a 11 | score $\square\square/31=$ | $\square, \square$ | $\times 10=$ | $\square\square$ |
| <b>Prolasso</b>                                                          | domande da 1 a 5  | score $\square\square/15=$ | $\square, \square$ | $\times 10=$ | $\square\square$ |
| <b>Sessualità</b>                                                        | domande da 1 a 9  | score $\square\square/24=$ | $\square, \square$ | $\times 10=$ | $\square\square$ |
| Score vescica+ score intestino+ score prolasso+ score attività sessuale= |                   |                            |                    |              |                  |

**Modulo postpartum**

**Rischio**

|                                                                                      |                                                   |                                                |                                                                                                       |                                 |
|--------------------------------------------------------------------------------------|---------------------------------------------------|------------------------------------------------|-------------------------------------------------------------------------------------------------------|---------------------------------|
| Quanti figli ha partorito?                                                           | <input type="checkbox"/> <input type="checkbox"/> | Durante quanti parti è stata usata la ventosa? |                                                                                                       | <input type="checkbox"/>        |
| Quanti parti sono avvenuti tramite taglio cesareo?                                   | <input type="checkbox"/>                          | Durante quanti parti è stato usato il forcipe? |                                                                                                       | <input type="checkbox"/>        |
| Quanto pesava alla nascita il figlio più grosso?                                     |                                                   |                                                | <input type="checkbox"/> <input type="checkbox"/> <input type="checkbox"/> <input type="checkbox"/> g | <input type="checkbox"/> >4000g |
| Durante uno dei parti, ha avuto danni a carico dello sfintere anale o dell'intestino |                                                   |                                                | <input type="checkbox"/> no                                                                           | <input type="checkbox"/> si     |
| Dopo il parto ha avuto dolori vaginali, perineali o intestinali?                     |                                                   |                                                | <input type="checkbox"/> no                                                                           | <input type="checkbox"/> si     |
| Dopo aver partorito, pensa di aver rielaborato i dolori del parto?                   | <input type="checkbox"/> si                       | <input type="checkbox"/> in gran parte         | <input type="checkbox"/> un poco                                                                      | <input type="checkbox"/> no     |
| Pensa di aver rielaborato le paure che aveva durante il parto?                       | <input type="checkbox"/> si                       | <input type="checkbox"/> in gran parte         | <input type="checkbox"/> un poco                                                                      | <input type="checkbox"/> no     |
